# Supplementary material
Source: PubMed Central journal article supplement (PMC2386938)
Supplement: M800313200_1.pdf [file M800313200_1.pdf]

# Supplemental Material

for

## Design of an Active Ultra-Stable Single-Chain Insulin Analog. SYNTHESIS, STRUCTURE, AND THERAPEUTIC IMPLICATIONS

Qing-xin Hua, Satoe H. Nakagawa, Wenhua Jia, Kun Huang, Nelson B. Phillips, Shuquan Hu,  
& Michael A. Weiss\*

### Table of Contents

|                                      |        |
|--------------------------------------|--------|
| Purpose of Supplement . . . . .      | 2      |
| Experimental Procedures . . . . .    | 2      |
| Supplemental Abbreviations . . . . . | 5      |
| Supplemental References . . . . .    | 5      |
| Figure S1 . . . . .                  | 6      |
| Figure S2 . . . . .                  | 6      |
| Figure S3 . . . . .                  | 7      |
| Figure S4 . . . . .                  | 8      |
| Figure S5 . . . . .                  | 9      |
| Table S1 . . . . .                   | 10     |
| Table S2 . . . . .                   | 10     |
| Table S3 . . . . .                   | 11, 12 |
| Table S4 . . . . .                   | 13, 14 |
| Table S5 . . . . .                   | 15     |
| Table S6 . . . . .                   | 16     |

## Purpose of Supplement

This supplement describes our synthetic methods in detail and contains five additional figures and six archival tables. In Figure S1 are shown 1D  $^1\text{H-NMR}$  spectra of SCI-57, 2CA, and the well-characterized engineered insulin monomer DKP-insulin. Figure S2 contains representative 2D-NMR spectra of SCI-57 and 2CA under two conditions (pD 7.6 at 32 °C and pD 7.0 at 25 °C). In Figure S3 are shown initial TOCSY spectra of SCI-57 and 2CA, obtained just after dissolving the proteins in 80%  $\text{D}_2\text{O}$  and 20% deuterioacetic acid; the two spectra exhibit similar patterns of protected amide resonances. Summaries of sequential assignment for SCI-57 and 2CA are provided in Figures S4 and S5. The six supplemental tables provide a summary of selected NMR NOEs (Tables S1 and S2), resonance assignments and chemical shifts (Tables S3 and S4), differences in chemical shifts between SCI-57 and 2CA (Table S5), and restraint information and statistical parameters related to the DG/RMD structure of SCI-57.

## Experimental Procedures

**Materials.** Human insulin was provided by Novo-Nordisk (Copenhagen, DK). 9-Fluorenylmethoxycarbonyl (Fmoc) amino acids were obtained from AnaSpec, Inc. (San Jose, CA) and Novabiochem (Darmstadt, Germany); 1,2-diisopropylcarbodiimide and N-hydroxybenzotriazole (recrystallized from 95% ethanol) were obtained from Sigma-Aldrich (St. Louis, MO). Chromatography resins were pre-swollen microgranular carboxymethylcellulose (CM-cellulose; CM52), diethylaminoethyl-cellulose (DE53; both from Whatman, Clifton, NJ) and Cellex E (Ecteola cellulose; Sigma-Aldrich, St. Louis, MO). Columns for reverse-phase (rp) high-performance liquid chromatography (HPLC) were semi-preparative C4 and C8 (dimensions 2.2 x 25 cm; Vydac, Inc., Hesperia, CA) and analytical C18 (dimensions 0.5 x 25 cm; Vydac). Solvents were HPLC grade.

**Synthesis of Insulin Chains.** To obtain the two-chain control analog 2CA, its component A- and B-chains (21 and 30 residues, respectively) were individually prepared by the solid-phase method using an automated peptide synthesizer (Omega model 396, Advanced Chem Tech, Louisville, KY) using Fmoc chemistry with standard side-chain protecting groups. Syntheses were performed by coupling amino-acid esters of 1-hydroxybenzotriazole (HOBt) using 1,3 diisopropylcarbodiimide (DIPC) as coupling agent. A three- or six-fold excess of  $\text{N}^\alpha$ -Fmoc amino-acid esters of HOBt in  $\text{N,N}$ -dimethylformamide (DMF) was employed at each step with a 1:1 ratio of amino acid to DIPC. Deprotection of the Fmoc group was effected by 25% piperidine in DMF twice (5 min and 25 min). After completion of the syntheses, the peptides were cleaved from the solid support and de-protected using a modified reagent K<sup>®</sup> cocktail consisting of 88% trifluoroacetic acid (TFA), 3% thioanisole, 5% ethanedithiol, 2% water and 2% phenol. The cleavage cocktail (4 ml) was added to the dried peptide-resins in a 15-ml glass vial blanketed with nitrogen; cleavage was carried out for 2.5 hrs with gentle magnetic stirring. Following cleavage, the mixture was filtered on a Quick-Snap column (IsoLabs Inc., Akron, OH). The filtrate was collected in 20-ml ice-cold butane ether. The peptides were allowed to precipitate for an hour at -20 °C, centrifuged, and washed twice with ice-cold methyl-*tert*-butyl ether. The precipitate was dissolved in 25% acetonitrile and lyophilized. The crude peptides were analyzed by analytical rp-HPLC (Beckman, System Gold HPLC) and mass spectrometry (MS) as determined by matrix-assisted laser-desorption ionization time-of-flight (MALDI-TOF; Applied Biosystem model 4800; Foster City, CA). Sulfitolysis of the crude peptides was in each case accomplished by dissolving the material (typically 100-300 mg) in 25 ml of a buffer consisting of 0.1 M 2-amino-2-hydroxymethyl-1,3-propanediol (Tris·HCl; pH 8.8), 8 M guanidine hydrochloride to which was added 500 mg of sodium tetrathionate dihydrate ( $\text{Na}_2\text{O}_6\text{S}_4$ ) and 750 mg of anhydrous sodium sulfite ( $\text{Na}_2\text{SO}_3$ ). The solution was allowed to react for 3.5 hr at room temperature, dialyzed against distilled deionized water ( $\text{ddH}_2\text{O}$ ) for 24 hours, and lyophilized.

**$\text{His}^{\text{A8}}$ -A-chain Analog.** Fmoc-Asn(Trt) Wang resin; (Novabiochem, Gibbstown, NJ) was used as solid support. After deblocking and sulfitolysis, the S-sulfonated chain was purified by chromatography on a Cellex E column (1.5 x 47 cm) equilibrated with 0.1 M Tris·HCl (pH 7.0). After application of the crude A-chain and an initial wash with 100 mL of the above buffer, elution was carried out with a linear NaCl gradient (from 0-1M) using 0.1

M Tris-HCl (250 mL) and 1 M NaCl in the above buffer (250 mL). The eluted sulfonated A-chain was dialyzed against ddH<sub>2</sub>O and lyophilized. 61 mg of the A-chain analog were obtained from 143 mg of the crude S-sulfonated material.

*[Asp<sup>B10</sup>, Asp<sup>B28</sup>, Pro<sup>B29</sup>]-B-chain Analog.* Fmoc-L-Thr (tBu-protected) Wang resin (AnaSpec Inc., San Jose, CA) was used as solid support. After deblocking and sulfitolysis, the crude S-sulfonated B-chain analog was purified by chromatography on a cellulose DE52 column (1.5 cm x 47 cm) equilibrated with 0.1 M Tris-HCl (pH 7.5). Elution was carried out with a linear NaCl gradient formed by adding to the above buffer (250 ml) 0.8 M NaCl in the same buffer (250 ml). The effluent corresponding to the major peak was collected, dialyzed against ddH<sub>2</sub>O (four changes over 24 hrs) and lyophilized. 117 mg of the B-chain analog were obtained from 124 mg of the crude S-sulfonated material.

*Synthesis of [His<sup>A8</sup>, Asp<sup>B10</sup>, Asp<sup>B28</sup>, Pro<sup>B29</sup>]-Insulin.* To obtain 2CA, chain combination (1) was effected by interaction of the S-sulfonated derivative of the A-chain analog (30 mg) and B-chain analog (15 mg) in 0.1 M glycine buffer (pH 10.6, 10 ml) in the presence of dithiothreitol (5.2 mg) as described (2,3). CM-52 cellulose chromatography of each combination mixture enabled partial isolation of the hydrochloride form of the protein contaminated by free B-chain (combined weight 4.3 mg). Final purification was accomplished by C18 rp-HPLC, yielding 2.8 mg of the insulin analog. Re-chromatography by analytical rp-HPLC gave a single peak; its predicted molecular mass (5808.5 Da) was verified (5807.6 Da) by MALDI-TOF MS. The overall yield of 2CA was similar to that obtained in control syntheses of wild-type human insulin.

*Synthesis of single-chain insulin analog.* SCI-57 was synthesized by native chemical ligation (4) of three peptides: *segment I* (B1-B6; polypeptide residues 1-6), *segment II* (B7-A6; polypeptide residues 7-42), and *segment III* (A7-A21; polypeptide residues 43-57). Segments III and II were first ligated; their product was then ligated to segment I to yield the reduced and unfolded 57-residue polypeptide. This synthetic scheme, exploiting cysteines at positions B7 and A7 as ligation sites, thus employs peptides of nominal lengths 6, 36, and 15 residues exclusive of C-terminal thioester extensions (segments I and II; see below). Assembly of peptide segments I and II employed t-Boc chemistry and an *in situ* neutralization protocol as described (5); peptide III was assembled by Fmoc chemistry on polyethylene glycol-polystyrene graft polymer (PEG-PS). Each segment was synthesized by a manual solid-phase protocol as described in turn below. Analyses of purity by rp-HPLC (C4 or C18, 2.1 x 50 mm, Microsorb, packed in-house) from Varian, (Palo Alto, CA) and subsequent verification of peptide masses were performed using an Agilent 1100 liquid chromatography/mass spectrometry (LC/MS) system. Preparative HPLC was performed using C4 or C8 columns (1.0 x 25 cm or 2.2 x 25 cm) from Vydac Inc. (Hesperia, CA).

*Synthesis of Segment I.* Segment I was synthesized as a thioester containing a C-terminal 3-mercaptopropionyl-Leu ( $\beta$ Mp-Leu) extension. The synthesis was started from *t*-Boc-Leu-phenylacetamido-methyl (PAM) resin (0.66 g; 0.5 mmol; Applied Biosystems; Foster City, CA), and the peptide chain was extended stepwise to the N-terminal residue. The Boc group was treated with neat TFA 3 times (each for 1 min), washed twice with DMF, and condensed with S-trityl- $\beta$ Mp (0.75 mmol) dissolved in 0.5M 2-(1H-benzotriazole-1-yl)-1,1,3,3-tetramethyluronium hexafluoro-phosphate (HBTU/DMF; 0.675 mmol) and diisopropylethylamine (DIEA; 1.5 mmol). After 20 min with occasional mixing, the solvent was drained, and the resin was washed once with DMF. To remove the S-trityl group, a mixture of TFA/water/triisopropyl silane (95:2.5:2.5 v/v/v) was applied 3 times (each for 1 min) followed by 2 washes with DMF. The next Boc-amino acid (2 mmol), activated with 0.5 M-HBTU (1.9 mmol) and DIEA (2.6 mmol; prepared 1 min before addition), was then added. After 30 min, another portion of DIEA (2.6 mmol) was added and the mixture was left for another 30 min. Removal of the Boc group by neat TFA and subsequent coupling reactions were repeated until the last residue, but the coupling reaction time was reduced to 10 min. The N-terminal Boc group was removed, and the peptidyl resin (dried from dichloromethane; DCM) was treated with anhydrous hydrofluoric acid (HF), with 10% *p*-cresole (v/v) added as scavenger, at 0 °C for 60 min. HF was evaporated in vacuo, and the residue was washed 4 times with diethyl ether. The peptide was extracted with a mixture of acetonitrile/water/TFA (50:50:0.1 v/v/v) and freeze-dried (wt 465 mg). A portion of crude peptide (150 mg) was purified by preparative C8 rp-HPLC in a solvent system of

water with 0.1% TFA (solvent A) and acetonitrile with 0.08% TFA (solvent B). A linear elution gradient (10-35%, solvent B) was applied over 50 min at the flow rate of 10 ml/min with optical detection of peptide bonds at 215 nm. Purified segment I thus obtained was 73 mg (over-all yield, 47%). MS gave a single compound with molecular mass 958.0 Da (calculated 958.2 Da).

*Synthesis of Segment II.* Boc-Gly-OCH<sub>2</sub>-Pam resin (0.64g; 0.5 mmol) was used for the synthesis of segment II, a  $\beta$ Mp-thioester containing C-terminal extension Arg-Arg-Gly. This charged moiety enhanced the solubility of the segment prior to its ligation. The N-terminal amino acid of segment II (Cys<sup>B7</sup>) was protected as 1,3-thiazolidine-4-carboxylic acid (thioprolin; Thz) as described (6,7). The peptide chain was elongated as above to the N-terminal Thz and cleaved by anhydrous HF (crude weight 544 mg). A portion (136 mg) was purified by preparative rp-HPLC using a C4 column in a solvent system of A/B (see above) from 20-35% solvent B in 45 min at the flow rate of 10 ml/min. The yield of purified peptide was 29.7 mg (16.4% relative to the starting Gly-OCH<sub>2</sub>-Pam resin). MS gave an observed molecular mass (4335.9 Da) similar to that predicted (4335.96 Da).

*Synthesis of Segment III.* Fmoc-Asn(trityl)-PEG-PS resin (0.5 mmol, 2.94 g; PerSeptive Biosystems, Framingham, MA), solvated in DMF, was treated with 20% piperidine in DMF for 20 min. After 3 DMF washings, the next Fmoc-amino acid (2 mmol) was activated with 0.5 M HBTU/DMF (3.8 ml), and DIEA (0.35 ml; 2 mmol) was added. The mixture was allowed to react for 20 min. An aliquot was tested for negative ninhydrin reaction prior to the subsequent step. After 3 washes with DMF, the same procedure was repeated at each cycle. The completed peptide on resin was dried from DCM after removal of the final Fmoc group (resin weight 2.12 g). A portion (1.09 g) was stirred with a cleavage mixture of 95% TFA, 2.5% water, and 2.5% ethanedithiol (v/v/v) (8 ml) at 0 °C for 5 min and then at room temp for 2 hr. The reaction mixture was filtered into diethyl ether (140 ml); the peptide precipitate was separated by centrifugation and washed twice more with diethyl ether. After drying in vacuo, 190 mg of crude segment III was obtained. This material was purified by preparative rp-HPLC using a C4 column at the flow rate of 10 ml/min; the linear gradient used was 10-25% (solvent B) over 45 min. Segment III thus obtained was 70 mg (overall yield 31.3%). MS demonstrated that the observed molecular mass (1789.3 Da) was in accord the predicted molecular mass (1790.02 Da).

*Synthesis of SCI (1-57) by Native Chemical Ligation.* Segment II, as a C-terminal-extended thioester ((Thz<sup>7</sup>-42)- $\beta$ Mp-RRG; 18.5 mg (4  $\mu$ moles)), segment III (an unmodified peptide, 7.7 mg (4  $\mu$ mol)), and tris-(2-carboxyethyl)-phosphine hydrochloride (TCEP·HCl; 12 mg (0.04 mmole)) were dissolved in 1.8 ml of a ligation buffer consisting of 0.1 M sodium phosphate (pH 6.9) and 6 M guanidine·HCl. After dissolution, the pH of the solution was re-adjusted to 7.0 with 2 M sodium hydroxide (NaOH), and an aliquot of ligation buffer was added to a final volume of 2.0 ml. Argon was flushed through the solution for 1 min, and thiophenol (10  $\mu$ l, 0.5% v/v) was added. The solution was tightly capped, stirred vigorously until the mixture became cloudy, placed on a shaker, and gently mixed at room temperature. After 8 hrs, additional aliquots of segment II (2 mg) and thiophenol (5  $\mu$ l) were added, and the pH of the mixture was re-adjusted to 7.0. After 12 hrs, CH<sub>3</sub>ONH<sub>2</sub>·HCl (49 mg) was added to a final concentration of 0.2 M (6,7) and the solution was kept for 9 hrs. The reaction mixture was transferred to a dialysis tube (Spectra/Por membrane with molecular-weight cut-off 1,000 Da; Fisher Scientific, Pittsburg, PA) and dialyzed against water (1 L x 5) for 1 day at room temperature. The dialyzed mixture containing precipitates was lyophilized. The dried powder was dissolved in the same ligation buffer (2 ml) and mixed with thioester peptide segment I ((1-6)- $\beta$ Mp-Leu; 4.2 mg (4.3  $\mu$ mol)) and TCEP·HCl (17.2 mg); the pH was re-adjusted to 6.9; argon was flushed, and thiophenol (15  $\mu$ l) was added (total volume, 3ml). After 20 hr, additional segment I (3.2 mg) was added; the pH was re-adjusted to 6.9, and additional thiophenol (5  $\mu$ l) was added. The reaction was continued for 8 more hrs, yielding a clear solution.

*Redox-Coupled Protein Folding.* To the above solution was added an oxidation-reduction-coupled (redox) buffer (0.4 ml) consisting of 100 mM reduced glutathione (GSH) and 10 mM oxidized glutathione (GSSG); the pH was adjusted to 8.6 with 2 N NaOH. This solution was immediately diluted with ddH<sub>2</sub>O to 40 ml. Soon after, precipitates appeared, which after 16 hr were centrifuged and separated from the supernatant (*folding mixture 1*).

The precipitate was dissolved in the same ligation buffer containing redox mixture (4 ml); the pH was adjusted to 8.6, and ddH<sub>2</sub>O was added to a final volume of 40 ml. Precipitates again appeared, and the mixture was centrifuged to separate the supernatant (*folding mixture 2*). Precipitates were once more dissolved, and the above procedure repeated to generate *folding mixture 3*. Each folding mixture was gently stirred for 1-2 days at room temperature. The extent of folding was periodically monitored by LC/MS. When almost no further folding was observed, the mixture was acidified to pH 2 with 10% TFA, and acetonitrile was added to a final concentration of 10% (v/v). The solutions were subjected to rp-HPLC using a C4 column (1 x 25cm); a gradient elution was applied from 15-35% (solvent B) over 40 min at the flow rate of 4 ml/min. Pure fractions corresponding to SCI-57 were pooled and lyophilized. In total, 6.6 mg was obtained, representing an overall yield of 24.4 % for the 2-step ligation procedure, subsequent folding, and purification. MS of the final product gave an observed molecular mass (6370.8 Da) in accord with the predicted molecular mass (6371.2 Da)

### Supplemental Abbreviations

βMp, 3-mercaptopropionyl; Boc, butoxycarbonyl; ddH<sub>2</sub>O, distilled de-ionized water; Da, Daltons; DCM, dichloromethane; DIPC, diisopropylcarbodiimide; DIEA, diisopropylethylamine; DMF, N,N-dimethylformamide; Fmoc, fluorenylmethoxycarbonyl; GSH, reduced glutathione; GSSG, oxidized glutathione; HBTU, 1H-benzotriazole-1-yl)-1,1,3,3-tetramethyluronium hexafluoro-phosphate; HOBt, 1-hydroxybenzotriazole; HPLC, high-performance liquid chromatography; kDa, kilo-dalton of mass; LC/MS, liquid chromatography coupled MS; MALDI-TOF, matrix-assisted laser-desorption ionization time-of-flight; MS, mass spectrometry; PAM, phenylacetamido-methyl resin; PEG-PS, polyethylene glycol-polystyrene graft polymer; pI, isoelectric point; rp-HPLC, reverse-phase HPLC; TCEP·HCl, tris-(2-carboxyethyl)-phosphine hydrochloride; TFA, trifluoroacetic acid; Thz, thiazolidine-4-carboxylic acid (thioprolin); and Wang resin, *p*-benzyloxybenzyl alcohol resin.

### Supplemental References

1. Chance, R. E., Hoffman, J. A., Kroeff, E. P., Johnson, M. G., Schirmer, W. E., and Borner, W. W. (1981) The production of human insulin using recombinant DNA technology and a new chain recombination procedure. In: Rich, D. H., and Gross, E. (eds). *Peptides: Synthesis, Structure and Function; Proceedings of the Seventh American Peptide Symposium*, Pierce Chemical Co., Rockford, IL
2. Hu, S. Q., Burke, G. T., Schwartz, G. P., Ferderigos, N., Ross, J. B., and Katsoyannis, P. G. (1993) *Biochemistry* **32**, 2631-2635
3. Hua, Q. X., Hu, S. Q., Frank, B. H., Jia, W., Chu, Y. C., Wang, S. H., Burke, G. T., Katsoyannis, P. G., and Weiss, M. A. (1996) *J. Mol. Biol.* **264**, 390-403
4. Dawson, P. E., and Kent, S. B. H. (2000) *Annu. Rev. Biochem.* **69**, 923-960
5. Schnolzer, M., Alewood, P., Jones, A., Alewood, D., and Kent, S. B. (1992) *Int. J. Pept. Protein Res.* **40**, 180-193
6. Villain, J., Vizzavona, K., and Rose, K. (2001) *Chem. Biol.* **8**, 673-679
7. Bang, D., and Kent, S. B. (2004) *Angew. Chem. Int. Ed. Engl.* **43**, 2534-2538

**Figure S1. Comparison of NMR spectra.** 1D  $^1\text{H}$ -NMR spectra of SCI-57 (A), its two-chain analog 2CA (B) and standard engineered monomer DKP-insulin (C). Single-chain analog retains favorable line widths and chemical-shift dispersion. Spectra were obtained at 700 MHz in  $\text{D}_2\text{O}$  at pD 7.6 (direct meter reading) and 32 °C.

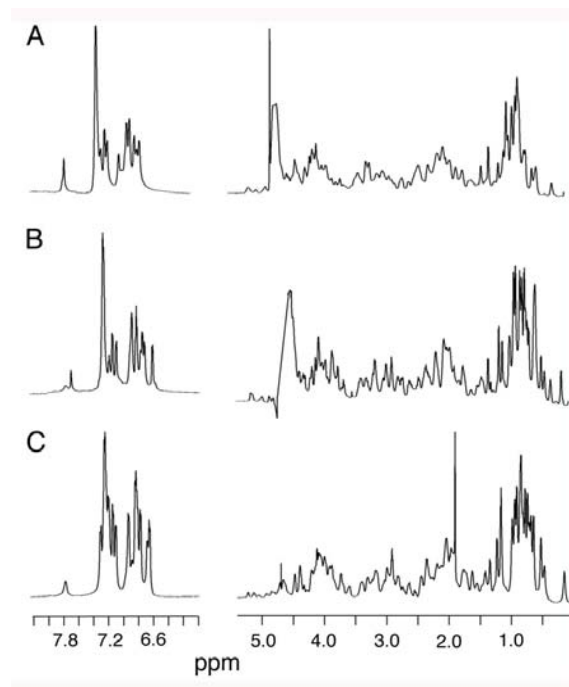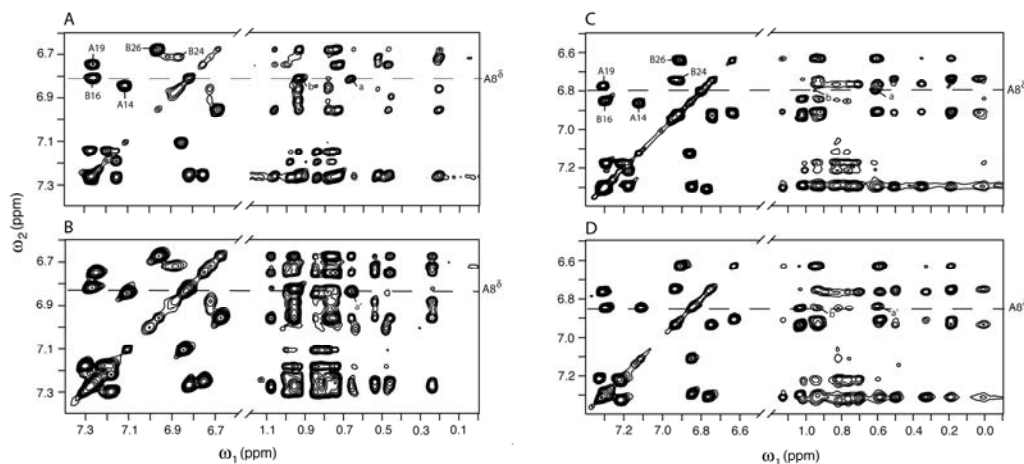

**Figure S2. 2D-NMR studies of SCI-57 and 2CA in  $\text{D}_2\text{O}$  under two conditions.** (A and B) NMR studies of SCI-57. (C and D) NMR studies of 2CA. In each panel (boxed) the TOCSY spectrum of the aromatic region is shown at left, and the NOESY spectrum of aromatic-aliphatic contacts is shown at right; TOCSY and NOESY mixing times were 55 and 200 ms, respectively. Spectra in panels A and C were acquired at pD 7.6 (direct meter reading) and 32 °C whereas spectra in panels B and D were acquired at pD 7.0 and 25 °C. Selected assignments are as labeled. Corresponding long-range NOEs from the  $\text{H}_\delta$  of  $\text{His}^{\text{A8}}$  to A3  $\gamma$ 1,2- $\text{CH}_3$  are labeled a and b (panels A and C) or a' and b' (panels B and D).

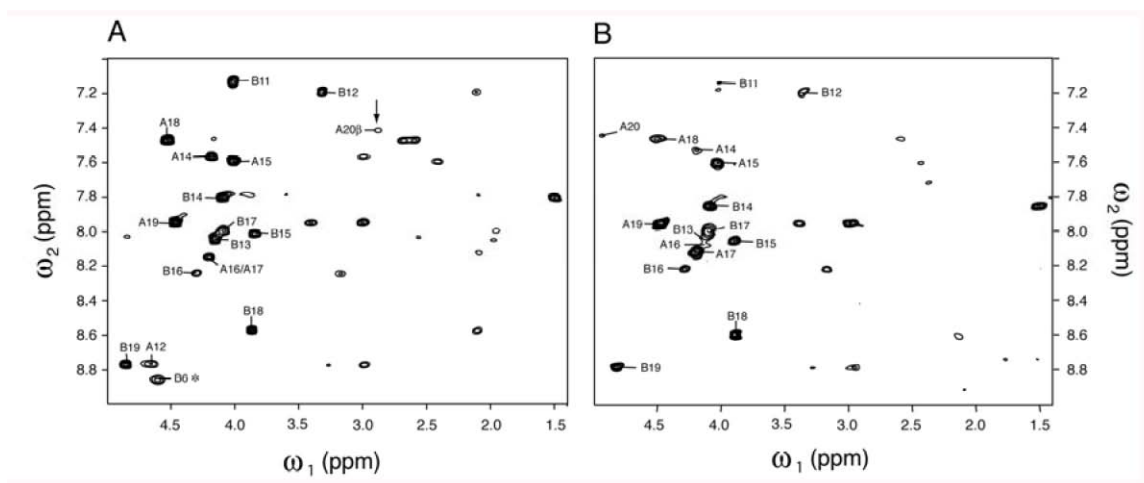

**Figure S3. SCI-57 and 2CA exhibit corresponding sites of amide proton protection in D<sub>2</sub>O.** TOCSY spectra of SCI-57 (A) and its two-chain analog 2CA (B) obtained within two hours after sample dissolved in 20% (v/v) deuterioacetic acid at 25 °C. The sample was first dissolved in H<sub>2</sub>O and then lyophilized as powder. 1D spectra, obtained within five minutes of initial dissolution in the deuterated solvent, provide evidence for additional sites of subglobal protection, including in each case Cys<sup>A11</sup> and Leu<sup>B6</sup> (sites of inter-chain or inter-domain hydrogen bonds in crystallographic T-state protomers, data not shown).





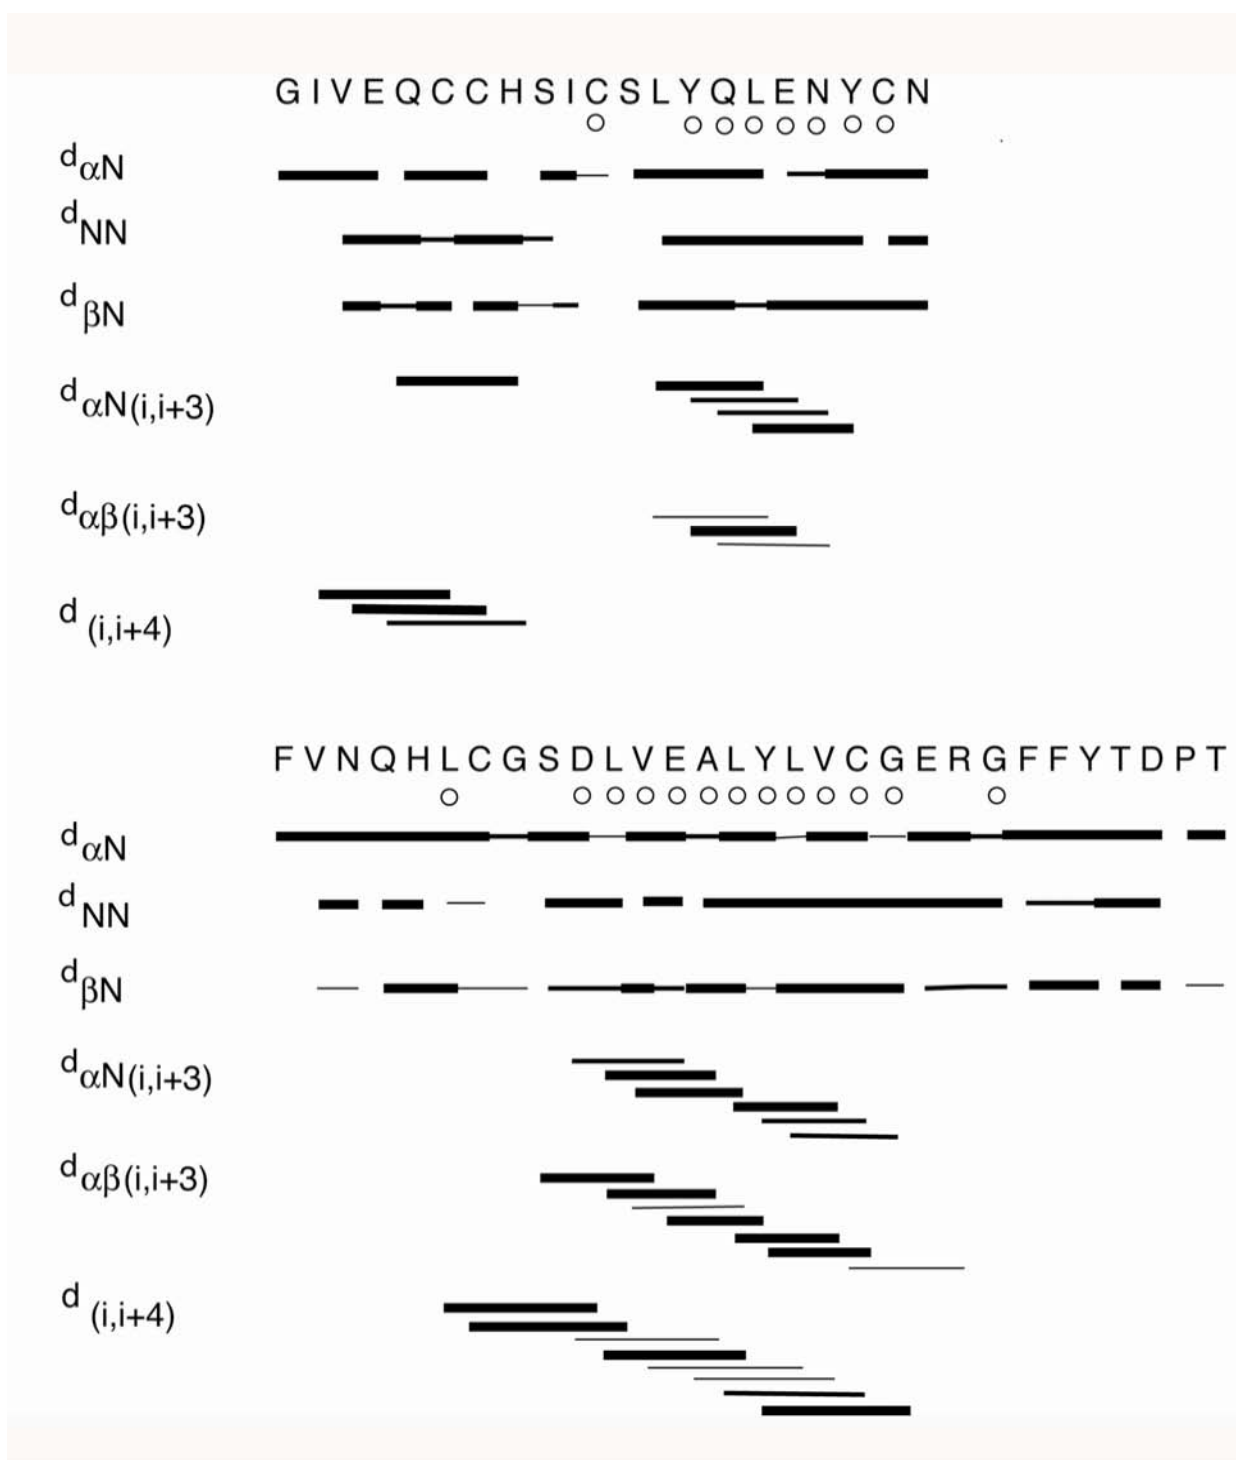

Figure S5. Summary of sequential assignment in Wuthrich format for two-chain analog 2CA. NOE intensities and protected amide protons are represented as in Figure S3.

**Table S1.** His<sup>A8</sup>-related NOEs in SCI-57 and 2CA.

| A8 proton         | SCI-57                             | 2CA                                |
|-------------------|------------------------------------|------------------------------------|
| A8 H <sub>N</sub> | A4 H <sub>α</sub>                  | A4 H <sub>α</sub>                  |
|                   | A5 H <sub>α</sub>                  | A5 H <sub>α</sub>                  |
| A8 H <sub>α</sub> | A4 H <sub>α</sub>                  |                                    |
|                   |                                    | B5 H <sub>α</sub>                  |
| A8 H <sub>β</sub> | A4 H <sub>α</sub>                  | A4 H <sub>α</sub>                  |
|                   | A4 H <sub>γ</sub>                  |                                    |
|                   | A5 H <sub>α</sub> , H <sub>β</sub> |                                    |
| A8 H <sub>δ</sub> | A3 H <sub>γ</sub>                  | A3 H <sub>γ</sub>                  |
|                   | A4 H <sub>α</sub> , H <sub>β</sub> | A4 H <sub>α</sub>                  |
|                   | A5 H <sub>α</sub> , H <sub>β</sub> |                                    |
| A8 H <sub>ε</sub> |                                    | A3 H <sub>γ</sub>                  |
|                   |                                    | A4 H <sub>β</sub> , H <sub>γ</sub> |

**Table S2.** NOE comparison between SCI-57 and 2CAA. Additional NOEs in SCI-57

| helix-related          | NOEs                     | long-range NOEs    | inter-chain NOEs         |                    |                      |
|------------------------|--------------------------|--------------------|--------------------------|--------------------|----------------------|
| A1 H <sub>N</sub>      | - A4 H <sub>β</sub>      | A6 H <sub>N</sub>  | - A10 H <sub>γ'</sub>    | A6 H <sub>α</sub>  | - B5 H <sub>β</sub>  |
| A1 H <sub>N</sub>      | - A5 H <sub>β</sub>      | A9 H <sub>N</sub>  | - A6 H <sub>α</sub>      | A7 H <sub>α</sub>  | - B5 H <sub>β</sub>  |
| A5 H <sub>N</sub>      | - A2 H <sub>α</sub>      | A11 H <sub>β</sub> | - A5 H <sub>β</sub>      | A11 H <sub>N</sub> | - B5 H <sub>α</sub>  |
| A7 H <sub>N</sub>      | - A4 H <sub>α</sub>      | B6 H <sub>α</sub>  | - B14 H <sub>β</sub>     | A21 H <sub>N</sub> | - B19 H <sub>α</sub> |
| A15 H <sub>N</sub>     | - A12 H <sub>α</sub>     | B23 H <sub>N</sub> | - B19 H <sub>β</sub>     | A21 H <sub>N</sub> | - B19 H <sub>β</sub> |
| A15 H <sub>N</sub>     | - A12 H <sub>β</sub>     | B4 H <sub>ε</sub>  | - A13 H <sub>•1, 2</sub> |                    |                      |
| A19 H <sub>E</sub>     | - A15 H <sub>β</sub>     | B8 H <sub>N</sub>  | - A7 H <sub>β</sub>      |                    |                      |
| A20 H <sub>N</sub>     | - A17 H <sub>α</sub>     | B14 H <sub>α</sub> | - A13 H <sub>•1, 2</sub> |                    |                      |
| B11 H <sub>γ</sub>     | - B15 H <sub>•1, 2</sub> | B18 H <sub>γ</sub> | - A16 H <sub>•1, 2</sub> |                    |                      |
| B11 H <sub>•1, 2</sub> | - B15 H <sub>•1, 2</sub> | B19 H <sub>α</sub> | - A17 H <sub>α</sub>     |                    |                      |
| B12 H <sub>N</sub>     | - B9 H <sub>α</sub>      | B25 H <sub>N</sub> | - A19 H <sub>β</sub>     |                    |                      |
| B14 H <sub>N</sub>     | - B10 H <sub>α</sub>     |                    |                          |                    |                      |
| B15 H <sub>•</sub>     | - B11 H <sub>•1, 2</sub> |                    |                          |                    |                      |
| B17 H <sub>N</sub>     | - B14 H <sub>β</sub>     |                    |                          |                    |                      |

B. Additional NOEs in 2CA

| helix-related | NOE | long-range NOE     | inter-chain NOE      |                    |                      |
|---------------|-----|--------------------|----------------------|--------------------|----------------------|
| none          |     | A3 H <sub>γ2</sub> | - A19 H <sub>ε</sub> | A21 H <sub>δ</sub> | - B23 H <sub>α</sub> |

**Table S3-A.** Chemical shifts of <sup>1</sup>H-NMR resonances of SCI-57 (pH 7.4 and 25 °C)

| Residue | NH   | C <sub>α</sub> H | C <sub>β</sub> H                   | others                                                                                                            |
|---------|------|------------------|------------------------------------|-------------------------------------------------------------------------------------------------------------------|
| B1 Phe  |      | 4.00             | 3.03, 2.96                         | C <sub>2,6</sub> H 7.18, C <sub>3,5</sub> H 7.31                                                                  |
| B2 Val  | 8.18 | 4.00             | 1.92                               | C <sub>γ</sub> H <sub>3</sub> 0.79, 0.79                                                                          |
| B3 Asn  | 8.62 | 4.63             | 2.82, 2.73                         |                                                                                                                   |
| B4 Gln  | 8.37 | 4.51             | 2.09, 1.93                         | C <sub>γ</sub> H <sub>2</sub> 2.20, 2.15                                                                          |
| B5 His  | 8.45 | 4.31             | 3.44, 3.04                         | C <sub>2</sub> H , C <sub>4</sub> H 6.89                                                                          |
| B6 Leu  | 9.08 | 4.60             | 1.75, 0.86                         | C <sub>γ</sub> H 1.66, C <sub>δ</sub> H <sub>3</sub> 0.74, 0.71                                                   |
| B7 Cys  | 8.80 | 4.97             | 3.20, 2.96                         |                                                                                                                   |
| B8 Gly  |      | 3.98, 3.86       |                                    |                                                                                                                   |
| B9 Ser  | 9.16 | 3.99             | 4.02, 3.90                         |                                                                                                                   |
| B10 Asp | 7.92 | 4.38             | 2.99, 2.63                         |                                                                                                                   |
| B11 Leu | 6.88 | 3.89             | 1.83, 1.13                         | C <sub>γ</sub> H 1.22, C <sub>δ</sub> H <sub>3</sub> 0.75, 0.65                                                   |
| B12 Val | 6.96 | 3.12             | 2.03                               | C <sub>γ</sub> H <sub>3</sub> 0.94, 0.78                                                                          |
| B13 Glu | 7.98 | 4.04             | 2.13, 2.06                         | C <sub>γ</sub> H <sub>2</sub> 2.43, 2.30                                                                          |
| B14 Ala | 7.54 | 4.02             | C <sub>β</sub> H <sub>3</sub> 1.34 |                                                                                                                   |
| B15 Leu | 7.94 | 3.68             | 1.00, 0.07                         | C <sub>γ</sub> H 1.26, C <sub>δ</sub> H <sub>3</sub> 0.52, 0.21                                                   |
| B16 Tyr | 8.10 | 4.33             | 3.14, 3.14                         | C <sub>2,6</sub> H 7.27, C <sub>3,5</sub> H 6.82                                                                  |
| B17 Leu | 7.64 | 4.04             | 1.98, 1.37                         | C <sub>γ</sub> H 1.75, C <sub>δ</sub> H <sub>3</sub> 0.95, 0.95                                                   |
| B18 Val | 8.44 | 3.73             | 1.94                               | C <sub>γ</sub> H <sub>3</sub> 0.98, 0.84                                                                          |
| B19 Cys | 8.80 | 4.80             | 3.26, 2.90                         |                                                                                                                   |
| B20 Gly | 7.70 | 3.98, 3.85       |                                    |                                                                                                                   |
| B21 Glu | 9.16 | 4.16             | 2.18, 2.04                         | C <sub>γ</sub> H <sub>2</sub> 2.34                                                                                |
| B22 Arg | 8.13 | 4.16             | 2.16, 2.04                         | C <sub>γ</sub> H <sub>2</sub> 1.85, C <sub>δ</sub> H <sub>2</sub> 3.38, 3.32                                      |
| B23 Gly | 7.31 | 4.12, 3.83       |                                    |                                                                                                                   |
| B24 Phe | 7.63 | 5.09             | 3.32, 2.87                         | C <sub>2,6</sub> H 6.72, C <sub>3,5</sub> H 6.88, C <sub>4</sub> H 6.95                                           |
| B25 Phe | 8.50 | 4.84             | 3.18                               | C <sub>2,6</sub> H 7.23, C <sub>3,5</sub> H 7.31                                                                  |
| B26 Tyr |      | 4.60             | 2.94, 2.94                         | C <sub>2,6</sub> H 6.96, C <sub>3,5</sub> H 6.68                                                                  |
| B27 Thr | 8.19 | 4.33             | 4.04                               | C <sub>γ</sub> H <sub>3</sub> 1.06                                                                                |
| B28 Asp | 8.50 | 4.75             | 2.76, 2.61                         |                                                                                                                   |
| B29 Pro |      | 4.42             | 2.25, 1.97                         | C <sub>γ</sub> H <sub>2</sub> 1.97, C <sub>δ</sub> H <sub>2</sub> 3.83                                            |
| B30 Thr | 8.33 | 4.32             | 4.29                               | C <sub>γ</sub> H <sub>3</sub> 1.22                                                                                |
| 31 Gly  |      |                  |                                    |                                                                                                                   |
| 32 Gly  |      |                  |                                    |                                                                                                                   |
| 33 Gly  | 8.26 | 4.10             |                                    |                                                                                                                   |
| 34 Pro  |      | 4.29             | 2.10, 1.96                         | C <sub>γ</sub> H <sub>2</sub> 1.96, C <sub>δ</sub> H <sub>2</sub> 3.60                                            |
| 35 Arg  | 8.37 | 4.28             | 1.90, 1.82                         | C <sub>γ</sub> H <sub>2</sub> 1.66, 1.62, C <sub>δ</sub> H <sub>2</sub> 3.13, 3.07                                |
| 36 Arg  |      | 4.22             | 1.88, 1.68                         | C <sub>γ</sub> H <sub>2</sub> 1.68, C <sub>δ</sub> H <sub>2</sub> 3.19                                            |
| A1 Gly  |      |                  |                                    |                                                                                                                   |
| A2 Ile  |      | 3.82             | 0.96                               | C <sub>γ</sub> H <sub>2</sub> 0.54, C <sub>γ</sub> 'H <sub>3</sub> 0.74, C <sub>δ</sub> H <sub>3</sub> 0.46       |
| A3 Val  | 7.98 | 3.50             | 1.94                               | C <sub>γ</sub> H <sub>3</sub> 0.94, 0.66                                                                          |
| A4 Glu  |      | 4.03             | 2.13, 2.13                         | C <sub>γ</sub> H <sub>2</sub> 2.49, 2.39                                                                          |
| A5 Gln  |      | 3.93             | 2.11                               | C <sub>γ</sub> H <sub>2</sub> 2.32                                                                                |
| A6 Cys  | 8.20 | 5.10             | 3.38, 2.81                         |                                                                                                                   |
| A7 Cys  | 8.21 | 4.88             | 3.78, 3.16                         |                                                                                                                   |
| A8 His  | 8.09 | 4.56             | 3.34, 3.29                         | C <sub>2</sub> H 6.82, C <sub>4</sub> H                                                                           |
| A9 Ser  | 7.32 | 4.69             | 3.96, 3.83                         |                                                                                                                   |
| A10 Ile | 7.80 | 4.27             | 1.52                               | C <sub>γ</sub> H <sub>2</sub> 1.01, 0.22, C <sub>γ</sub> 'H <sub>3</sub> 0.62, C <sub>δ</sub> H <sub>3</sub> 0.46 |
| A11 Cys | 9.98 | 5.18             | 3.22                               |                                                                                                                   |
| A12 Ser | 8.59 | 4.62             | 4.20, 4.02                         |                                                                                                                   |
| A13 leu | 8.75 | 3.90             | 1.44, 1.44                         | C <sub>γ</sub> H 1.52, C <sub>δ</sub> H <sub>3</sub> 0.84, 0.77                                                   |
| A14 Tyr | 7.67 | 4.31             | 3.02, 2.98                         | C <sub>2,6</sub> H 7.11, C <sub>3,5</sub> H 6.87                                                                  |
| A15 Gln | 7.49 | 3.94             | 2.21, 2.03                         | C <sub>γ</sub> H <sub>2</sub> 2.40, 2.34, NεH <sub>2</sub> 7.57, 7.05                                             |
| A16 Leu | 7.91 | 4.12             | 1.98, 1.40                         | C <sub>γ</sub> H 1.74, C <sub>δ</sub> H <sub>3</sub> 0.74, 0.74                                                   |
| A17 Glu | 8.12 | 4.16             | 2.05, 1.98                         | C <sub>γ</sub> H <sub>2</sub> 2.36, 2.19                                                                          |
| A18 Asn | 7.31 | 4.46             | 2.61, 2.52                         | NδH <sub>2</sub> 7.21, 6.52                                                                                       |
| A19 Tyr | 7.96 | 4.36             | 3.32, 2.89                         | C <sub>2,6</sub> H 7.26, C <sub>3,5</sub> H 6.75                                                                  |
| A20 Cys | 7.37 | 5.06             | 3.31, 2.84                         |                                                                                                                   |
| A21 Asn | 8.12 | 4.48             | 2.80, 2.67                         | NδH <sub>2</sub> 7.48, 6.42                                                                                       |

<sup>a</sup>Chemical-shifts relative to 5,5-dimethylsilapentanesulfonate (0 ppm).

**Table S3-B.** Chemical shifts of <sup>1</sup>H-NMR resonances of SCI-57 (20% deuterioacetic acid and 25 °C )

| Residue | NH   | C <sub>α</sub> H | C <sub>β</sub> H      | others                                                                     |
|---------|------|------------------|-----------------------|----------------------------------------------------------------------------|
| B1 Phe  |      | 4.31             | 3.20, 3.20            | C <sub>2,6</sub> H 7.25, C <sub>3,5</sub> H 7.38                           |
| B2 Val  | 8.22 | 4.14             | 1.94                  | CγH <sub>3</sub> 0.88, 0.88                                                |
| B3 Asn  | 8.52 | 4.73             | 2.76, 2.70            | NδH <sub>2</sub> 7.59, 6.97                                                |
| B4 Gln  | 8.43 | 4.48             | 2.11, 1.92            | CγH <sub>2</sub> 2.26, 2.20, NεH <sub>2</sub> 7.35, 6.85                   |
| B5 His  | 8.61 | 4.58             | 3.57, 3.27            | C2H 8.50, C4H 7.40                                                         |
| B6 Leu  | 8.82 | 4.58             | 1.72, 0.98            | CγH 1.60, CδH <sub>3</sub> 0.90, 0.77                                      |
| B7 Cys  | 8.37 | 4.92             | 3.22, 2.98            |                                                                            |
| B8 Gly  | 9.08 | 4.02, 3.89       |                       |                                                                            |
| B9 Ser  | 9.05 | 4.17             | 3.97, 3.97            |                                                                            |
| B10 Asp | 8.24 | 4.52             | 3.22, 2.86            |                                                                            |
| B11 Leu | 7.12 | 4.00             | 1.93, 1.22            | CγH 1.34, CδH <sub>3</sub> 0.84, 0.75                                      |
| B12 Val | 7.17 | 3.30             | 2.10                  | CγH <sub>3</sub> 0.95, 0.95                                                |
| B13 Glu | 8.03 | 4.15             | 2.20, 2.11            | CγH <sub>2</sub> 2.55                                                      |
| B14 Ala | 7.80 | 4.08             | CβH <sub>3</sub> 1.48 |                                                                            |
| B15 Leu | 8.02 | 3.83             | 1.29, 0.55            | CγH 1.45, CδH <sub>3</sub> 0.65, 0.42                                      |
| B16 Tyr | 8.24 | 4.28             | 3.16, 3.16            | C <sub>2,6</sub> H 7.16, C <sub>3,5</sub> H 6.80                           |
| B17 Leu | 7.98 | 4.08             | 1.97, 1.66            | CγH 1.90, CδH <sub>3</sub> 0.95, 0.95                                      |
| B18 Val | 8.55 | 3.86             | 2.09                  | CγH <sub>3</sub> 1.04, 0.88                                                |
| B19 Cys | 8.76 | 4.84             | 3.26, 2.97            |                                                                            |
| B20 Gly | 7.77 | 4.01, 3.89       |                       |                                                                            |
| B21 Glu | 8.70 | 4.19             | 2.22, 2.12            | CγH <sub>2</sub> 2.56                                                      |
| B22 Arg | 8.06 | 4.22             | 2.02, 1.83            | CγH <sub>2</sub> 1.80, CδH <sub>2</sub> 3.32, NεH <sub>2</sub> 7.14        |
| B23 Gly | 7.52 | 4.07, 3.86       |                       |                                                                            |
| B24 Phe | 7.72 | 4.94             | 3.22, 2.97            | C <sub>2,6</sub> H 6.90, C <sub>3,5</sub> H 7.04, C4H 7.06                 |
| B25 Phe | 8.41 | 4.71             | 3.14, 3.08            | C <sub>2,6</sub> H 7.23, C <sub>3,5</sub> H 7.28                           |
| B26 Tyr | 8.03 | 4.63             | 2.95, 2.95            | C <sub>2,6</sub> H 7.07, C <sub>3,5</sub> H 6.78                           |
| B27 Thr | 7.74 | 4.37             | 4.16                  | CγH <sub>3</sub> 1.14                                                      |
| B28 Asp | 8.31 | 4.92             | 2.96, 2.76            |                                                                            |
| B29 Pro |      | 4.47             | 2.27, 2.06            | CγH <sub>2</sub> 2.02, CδH <sub>2</sub> 3.84                               |
| B30 Thr | 7.92 | 4.40             | 4.37                  | CγH <sub>3</sub> 1.22                                                      |
| 31 Gly  | 8.14 | 4.06, 4.01       |                       |                                                                            |
| 32 Gly  | 8.22 | 4.03, 4.03       |                       |                                                                            |
| 33 Gly  | 8.25 | 4.21, 4.08       |                       |                                                                            |
| 34 Pro  |      | 4.47             | 2.26, 2.00            | CγH <sub>2</sub> 1.92, CδH <sub>2</sub> 3.69, 3.63                         |
| 35 Arg  | 8.34 | 4.31             | 1.94, 1.84            | CγH <sub>2</sub> 1.72, 1.64, CδH <sub>2</sub> 3.19, NεH <sub>2</sub> 7.21  |
| 36 Arg  | 8.19 | 4.32             | 1.92, 1.85            | CγH <sub>2</sub> 1.70, 1.68, CδH <sub>2</sub> 3.22, NεH <sub>2</sub> 7.24  |
| A1 Gly  | 8.46 | 4.09, 4.09       |                       |                                                                            |
| A2 Ile  | 7.83 | 3.87             | 1.17                  | CγH <sub>2</sub> 1.38, 0.82, Cγ'H <sub>3</sub> 0.76, CδH <sub>3</sub> 0.62 |
| A3 Val  | 7.80 | 3.59             | 2.05                  | CγH <sub>3</sub> 0.96, 0.86                                                |
| A4 Glu  | 8.18 | 4.08             | 2.14, 2.14            | CγH <sub>2</sub> 2.53, 2.53                                                |
| A5 Gln  | 8.28 | 4.09             | 2.16, 2.12            | CγH <sub>2</sub> 2.49, 2.44, NεH <sub>2</sub> 7.53, 6.94                   |
| A6 Cys  | 8.37 | 4.94             | 3.37, 2.91            |                                                                            |
| A7 Cys  | 8.00 | 4.82             | 3.73, 3.14            |                                                                            |
| A8 His  | 8.13 | 4.58             | 3.55, 3.36            | C2H 8.70, C4H 7.30                                                         |
| A9 Ser  | 7.49 | 4.78             | 4.14, 3.94            |                                                                            |
| A10 Ile | 7.91 | 4.47             | 1.63                  | CγH <sub>2</sub> 1.20, Cγ'H <sub>3</sub> 0.69, CδH <sub>3</sub> 0.57       |
| A11 Cys | 9.69 |                  | 3.16                  |                                                                            |
| A12 Ser | 8.77 | 4.64             | 4.34, 4.03            |                                                                            |
| A13 leu | 8.68 | 3.89             | 1.40, 1.40            | CγH 1.46, CδH <sub>3</sub> 0.85, 0.79                                      |
| A14 Tyr | 7.57 | 4.18             | 3.00, 2.93            | C <sub>2,6</sub> H 7.09, C <sub>3,5</sub> H 6.86                           |
| A15 Gln | 7.59 | 4.00             | 2.05                  | CγH <sub>2</sub> 2.47, 2.40, NεH <sub>2</sub> 7.55, 7.00                   |
| A16 Leu | 8.05 | 4.14             | 1.96, 1.52            | CγH 1.77, CδH <sub>3</sub> 0.88, 0.83                                      |
| A17 Glu | 8.15 | 4.18             | 2.14, 2.05            | CγH <sub>2</sub> 2.59, 2.39                                                |
| A18 Asn | 7.46 | 4.51             | 2.66, 2.60            | NδH <sub>2</sub> 7.26, 6.53                                                |
| A19 Tyr | 7.95 | 4.44             | 3.38, 2.99            | C <sub>2,6</sub> H 7.31, C <sub>3,5</sub> H 6.80                           |
| A20 Cys | 7.42 | 4.97             | 3.28, 2.87            |                                                                            |
| A21 Asn | 8.27 | 4.72             | 2.88, 2.73            | NδH <sub>2</sub> 7.52, 6.57                                                |

<sup>a</sup>Chemical-shifts relative to 5,5-dimethylsilapentanesulfonate (0 ppm).

**Table S4-A.** Chemical shifts of <sup>1</sup>H-NMR resonances of 2CA (pH 7.4 and 25°C)

| Residue | NH   | C <sub>α</sub> H | C <sub>β</sub> H      | others                                                                     |
|---------|------|------------------|-----------------------|----------------------------------------------------------------------------|
| A1 Gly  |      |                  |                       |                                                                            |
| A2 Ile  |      | 3.69             | 0.90                  | CγH <sub>2</sub> 0.70, 0.59, Cγ'H <sub>3</sub> 0.50, CδH <sub>3</sub> 0.34 |
| A3 Val  | 8.34 | 3.40             | 1.82                  | CγH <sub>3</sub> 0.90, 0.60                                                |
| A4 Glu  | 8.46 | 3.85             | 2.16, 2.16            | CγH <sub>2</sub> 2.58, 2.29                                                |
| A5 Gln  | 8.04 | 4.03             | 2.07                  | CγH <sub>2</sub> 2.53, 2.42                                                |
| A6 Cys  | 8.30 | 5.01             | 3.21, 2.79            |                                                                            |
| A7 Cys  | 8.17 | 4.86             | 3.81, 3.21            |                                                                            |
| A8 His  | 8.10 | 4.52             | 3.48, 3.31            | C2H 6.83, C4H 7.84                                                         |
| A9 Ser  | 7.16 | 4.71             | 4.05, 3.87            |                                                                            |
| A10 Ile | 7.76 | 4.38             | 1.50                  | CγH <sub>2</sub> 1.01, 0.65, Cγ'H <sub>3</sub> 0.48, CδH <sub>3</sub> 0.28 |
| A11 Cys | 9.92 |                  |                       |                                                                            |
| A12 Ser |      | 4.61             | 4.17, 3.99            |                                                                            |
| A13 leu | 8.73 | 3.88             | 1.44, 1.44            | CγH 1.51, CδH <sub>3</sub> 0.81,0.76                                       |
| A14 Tyr | 7.64 | 4.32             | 3.02, 2.98            | C <sub>2,6</sub> H 7.11, C <sub>3,5</sub> H 6.85                           |
| A15 Gln | 7.47 | 3.94             | 2.21, 2.02            | CγH <sub>2</sub> 2.39, 2.34, NεH <sub>2</sub> 7.57,7.07                    |
| A16 Leu | 7.87 | 4.11             | 1.94, 1.44            | CγH 1.72, CδH <sub>3</sub> 0.77, 0.71                                      |
| A17 Glu | 8.01 | 4.19             | 2.04, 1.98            | CγH <sub>2</sub> 2.36, 2.21                                                |
| A18 Asn | 7.30 | 4.44             | 2.60, 2.49            | NδH <sub>2</sub> 7.13, 6.54                                                |
| A19 Tyr | 7.96 | 4.35             | 3.41, 2.81            | C <sub>2,6</sub> H 7.31, C <sub>3,5</sub> H 6.76                           |
| A20 Cys | 7.32 | 5.13             | 3.31, 2.81            |                                                                            |
| A21 Asn | 8.13 | 4.48             | 2.76, 2.64            | NδH <sub>2</sub> 7.44,6.26                                                 |
| B1 Phe  |      | 4.11             | 3.12, 3.12            | C <sub>2,6</sub> H 7.22, C <sub>3,5</sub> H 7.33                           |
| B2 Val  |      | 4.01             | 1.91                  | CγH <sub>3</sub> 0.83,0.83                                                 |
| B3 Asn  | 8.57 | 4.59             | 2.81, 2.72            |                                                                            |
| B4 Gln  |      | 4.49             | 1.94,1.94             | CγH <sub>2</sub> 2.16, 2.16                                                |
| B5 His  | 8.44 | 4.29             | 3.46, 3.06            | C2H , C4H 6.95                                                             |
| B6 Leu  | 9.12 | 4.57             | 1.74, 0.81            | CγH 1.64,CδH <sub>3</sub> 0.72, 0.68                                       |
| B7 Cys  | 8.72 | 5.00             | 3.20, 2.92            |                                                                            |
| B8 Gly  | 9.55 | 3.98, 3.86       |                       |                                                                            |
| B9 Ser  | 9.18 | 4.18             | 3.99, 3.99            |                                                                            |
| B10 Asp | 7.90 | 4.38             | 3.03, 2.63            |                                                                            |
| B11 Leu | 6.88 | 3.87             | 1.83, 1.05            | CγH 1.12, CδH <sub>3</sub> 0.60, 0.60                                      |
| B12 Val | 7.03 | 3.18             | 2.07                  | CγH <sub>3</sub> 1.02,0.92                                                 |
| B13 Glu | 7.97 | 4.09             | 2.08, 2.08            | CγH <sub>2</sub> 2.47, 2.31                                                |
| B14 Ala | 7.55 | 4.08             | CβH <sub>3</sub> 1.36 |                                                                            |
| B15 Leu | 7.95 | 3.66             | 0.91, 0.02            | CγH 1.19, CδH <sub>3</sub> 0.50, 0.19                                      |
| B16 Tyr | 8.20 | 4.40             | 3.17, 3.17            | C <sub>2,6</sub> H 7.30, C <sub>3,5</sub> H 6.85                           |
| B17 Leu | 7.68 | 4.08             | 1.91, 1.78            | CγH 1.78, CδH <sub>3</sub> 0.94,0.94                                       |
| B18 Val | 8.43 | 3.77             | 1.97                  | CγH <sub>3</sub> 1.00, 0.86                                                |
| B19 Cys | 8.88 | 4.88             | 3.29, 2.92            |                                                                            |
| B20 Gly | 7.75 | 3.98, 3.85       |                       |                                                                            |
| B21 Glu | 9.18 | 4.18             | 2.20, 2.05            | CγH <sub>2</sub> 2.37                                                      |
| B22 Arg | 8.13 | 4.12             | 2.16, 2.08            | CγH <sub>2</sub> 1.89, CδH <sub>2</sub> 3.40, 3.32                         |
| B23 Gly | 7.31 | 4.10, 3.80       |                       |                                                                            |
| B24 Phe | 7.52 | 5.14             | 3.38, 2.91            | C <sub>2,6</sub> H 6.75, C <sub>3,5</sub> H 6.92, C <sub>4</sub> H 6.94    |
| B25 Phe | 8.69 | 4.87             | 3.21, 3.18            | C <sub>2,6</sub> H 7.28, C <sub>3,5</sub> H 7.32                           |
| B26 Tyr | 8.18 | 4.61             | 2.99, 2.89            | C <sub>2,6</sub> H 6.92, C <sub>3,5</sub> H 6.63                           |
| B27 Thr | 7.56 | 4.29             | 4.08                  | CγH <sub>3</sub> 1.13                                                      |
| B28 Asp | 8.21 | 4.84             | 2.74, 2.47            |                                                                            |
| B29 Pro |      | 4.50             | 2.20, 2.04            | CγH <sub>2</sub> 1.94, CδH <sub>2</sub> 3.79                               |
| B30 Thr | 7.90 | 4.22             | 4.09                  | CγH <sub>3</sub> 1.18                                                      |

<sup>a</sup>Chemical-shifts relative to 5,5-dimethylsilapentanesulfonate (0 ppm).

**Table S4-B.** Chemical shifts of <sup>1</sup>H-NMR resonances of 2CA (20% deuterioacetic acid and 25°C )

| Residue | NH   | CaH        | C <sub>β</sub> H      | others                                                                     |
|---------|------|------------|-----------------------|----------------------------------------------------------------------------|
| A1 Gly  |      |            |                       |                                                                            |
| A2 Ile  | 8.57 | 3.88       | 1.13                  | CγH <sub>2</sub> 0.94, 0.81, Cγ'H <sub>3</sub> 0.74, CδH <sub>3</sub> 0.60 |
| A3 Val  | 8.14 | 3.58       | 1.95                  | CγH <sub>3</sub> 0.95, 0.83                                                |
| A4 Glu  | 8.22 | 4.04       | 2.16, 2.16            | CγH <sub>2</sub> 2.56, 2.46                                                |
| A5 Gln  | 8.26 | 4.08       | 2.12, 2.12            | CγH <sub>2</sub> 2.52, 2.44, NεH <sub>2</sub>                              |
| A6 Cys  | 8.42 | 4.96       | 3.34, 2.87            |                                                                            |
| A7 Cys  | 8.00 | 4.85       | 3.78, 3.18            |                                                                            |
| A8 His  | 8.19 | 4.58       | 3.58, 3.40            | C2H 8.73, C6H 7.31                                                         |
| A9 Ser  | 7.44 | 4.78       | 4.14, 3.96            |                                                                            |
| A10 Ile | 7.88 | 4.42       | 1.61                  | CγH <sub>2</sub> 1.18, Cγ'H <sub>3</sub> 0.70, CδH <sub>3</sub> 0.58       |
| A11 Cys | 9.74 |            |                       |                                                                            |
| A12 Ser | 8.77 | 4.64       | 4.34, 4.03            |                                                                            |
| A13 leu | 8.67 | 3.89       | 1.38, 1.38            | CγH 1.45, CδH <sub>3</sub> 0.83,0.77                                       |
| A14 Tyr | 7.54 | 4.19       | 3.00, 2.92            | C <sub>2,6</sub> H 7.08, C <sub>3,5</sub> H 6.85                           |
| A15 Gln | 7.60 | 4.02       | 2.05                  | CγH <sub>2</sub> 2.49, 2.41, NεH <sub>2</sub> 7.54,6.98                    |
| A16 Leu | 8.10 | 4.17       | 1.94, 1.62            | CγH 1.76, CδH <sub>3</sub> 0.83, 0.81                                      |
| A17 Glu | 8.13 | 4.21       | 2.13, 2.06            | CγH <sub>2</sub> 2.59, 2.38                                                |
| A18 Asn | 7.45 | 4.50       | 2.62, 2.56            | NδH <sub>2</sub> 7.20, 6.56                                                |
| A19 Tyr | 7.93 | 4.46       | 3.38, 2.98            | C <sub>2,6</sub> H 7.34, C <sub>3,5</sub> H 6.81                           |
| A20 Cys | 7.44 | 4.92       | 3.27, 2.85            |                                                                            |
| A21 Asn | 8.31 | 4.75       | 2.89, 2.77            | NδH <sub>2</sub> 7.53,6.66                                                 |
| B1 Phe  |      | 4.30       | 3.15, 3.15            | C <sub>2,6</sub> H 7.24, C <sub>3,5</sub> H 7.37                           |
| B2 Val  | 8.23 | 4.15       | 1.94                  | CγH <sub>3</sub> 0.88,0.88                                                 |
| B3 Asn  | 8.52 | 4.74       | 2.76, 2.76            | NδH <sub>2</sub> 7.60,6.96                                                 |
| B4 Gln  | 8.45 | 4.49       | 2.10,1.92             | CγH <sub>2</sub> 2.27, 2.20, NεH <sub>2</sub> 7.36,6.86                    |
| B5 His  | 8.63 | 4.54       | 3.56, 3.28            | C2H 8.62, C6H 7.41                                                         |
| B6 Leu  | 8.85 | 4.59       | 1.74, 0.95            | CγH 1.63,CδH <sub>3</sub> 0.91,0.79                                        |
| B7 Cys  | 8.37 | 4.93       | 3.21, 2.96            |                                                                            |
| B8 Gly  | 9.13 | 4.03, 3.89 |                       |                                                                            |
| B9 Ser  | 9.05 | 4.18       | 4.02, 4.02            |                                                                            |
| B10 Asp | 8.22 | 4.53       | 3.22, 2.86            |                                                                            |
| B11 Leu | 7.12 | 4.01       | 1.91, 1.22            | CγH 1.37, CδH <sub>3</sub> 0.82, 0.77                                      |
| B12 Val | 7.19 | 3.35       | 2.11                  | CγH <sub>3</sub> 0.96,0.96                                                 |
| B13 Glu | 8.02 | 4.15       | 2.20, 2.11            | CγH <sub>2</sub> 2.55                                                      |
| B14 Ala | 7.83 | 4.09       | CβH <sub>3</sub> 1.49 |                                                                            |
| B15 Leu | 8.04 | 3.88       | 1.34, 0.70            | CγH 1.50, CδH <sub>3</sub> 0.70, 0.52                                      |
| B16 Tyr | 8.20 | 4.28       | 3.17, 3.17            | C <sub>2,6</sub> H 7.16, C <sub>3,5</sub> H 6.80                           |
| B17 Leu | 7.98 | 4.09       | 1.94, 1.66            | CγH 1.87, CδH <sub>3</sub> 0.95,0.95                                       |
| B18 Val | 8.58 | 3.88       | 2.12                  | CγH <sub>3</sub> 1.04, 0.90                                                |
| B19 Cys | 8.78 | 4.82       | 3.28, 2.96            |                                                                            |
| B20 Gly | 7.78 | 3.96, 3.96 |                       |                                                                            |
| B21 Glu | 8.50 | 4.24       | 2.21, 2.11            | CγH <sub>2</sub> 2.53                                                      |
| B22 Arg | 8.03 | 4.24       | 1.97, 1.82            | CγH <sub>2</sub> 1.76, CδH <sub>2</sub> 3.28, NεH <sub>2</sub> 7.15        |
| B23 Gly | 7.69 | 4.04, 3.86 |                       |                                                                            |
| B24 Phe | 7.74 | 4.85       | 3.18, 2.94            | C <sub>2,6</sub> H 6.95, C <sub>3,5</sub> H 7.09, C <sub>4</sub> H         |
| B25 Phe | 8.34 | 4.70       | 3.13, 3.04            | C <sub>2,6</sub> H 7.21, C <sub>3,5</sub> H 7.28                           |
| B26 Tyr | 8.01 | 4.64       | 2.94, 2.94            | C <sub>2,6</sub> H 7.04, C <sub>3,5</sub> H 6.78                           |
| B27 Thr | 7.79 | 4.33       | 4.12                  | CγH <sub>3</sub> 1.14                                                      |
| B28 Asp | 8.31 | 4.90       | 2.96, 2.75            |                                                                            |
| B29 Pro |      | 4.51       | 2.26, 2.03            | CγH <sub>2</sub> 2.03, CδH <sub>2</sub> 3.81                               |
| B30 Thr | 7.97 | 4.49       | 4.40                  | CγH <sub>3</sub> 1.22                                                      |

<sup>a</sup>Chemical-shifts relative to 5,5-dimethylsilapentanesulfonate (0 ppm).

**Table S5-A.** Chemical-Shift Differences between SCI-57 and 2CA at pH 7.4 and 25 °C<sup>a</sup>

| residue | NH    | C <sub>α</sub> H | C <sub>β</sub> H | others                                                     |
|---------|-------|------------------|------------------|------------------------------------------------------------|
| B1 Phe  |       | -0.11            |                  |                                                            |
| B8 Gly  |       |                  |                  |                                                            |
| B9 Ser  |       | -0.19            |                  |                                                            |
| B11 Leu |       |                  |                  | C <sub>γ</sub> H 0.10, CδH <sub>3</sub> 0.15               |
| B12 Val |       |                  |                  | C <sub>γ</sub> H <sub>3</sub> , -0.14                      |
| B16 Tyr | -0.10 |                  |                  |                                                            |
| B20 Gly | -0.12 |                  |                  |                                                            |
| B24 Phe | 0.11  |                  |                  |                                                            |
| B25 Phe | -0.19 |                  |                  |                                                            |
| B27 Thr | 0.63  |                  |                  |                                                            |
| B28 Asp | 0.29  |                  | 0.14             |                                                            |
| B30 Thr | 0.43  | 0.10             | 0.20             |                                                            |
| A2 Ile  |       | 0.13             |                  | C <sub>γ</sub> H <sub>2</sub> -0.16                        |
| A3 Val  | -0.36 | 0.10             | 0.12             |                                                            |
| A4 Glu  |       |                  |                  | C <sub>γ</sub> H <sub>2</sub> , 0.10                       |
| A5 Gln  | -0.10 |                  |                  | C <sub>γ</sub> H <sub>2</sub> , -0.10                      |
| A6 Cys  | -0.10 |                  | 0.17             |                                                            |
| A9 Ser  | 0.16  |                  |                  |                                                            |
| A10 Ile |       | -0.11            |                  | C <sub>γ</sub> 'H <sub>3</sub> 0.14, CδH <sub>3</sub> 0.18 |
| A17 Glu | 0.11  |                  |                  |                                                            |

**Table S5-B.** Chemical-Shift Differences between SCI-57 and 2CA (20% deuterioacetic acid and 25°C)

| residue | NH    | C <sub>α</sub> H | C <sub>β</sub> H | others                              |
|---------|-------|------------------|------------------|-------------------------------------|
| B5 His  |       | 0.10             |                  | C <sub>2</sub> H -0.12              |
| B15 Leu |       |                  |                  | C <sub>δ</sub> H <sub>3</sub> -0.10 |
| B21 Glu | 0.20  |                  |                  |                                     |
| B23 Gly | -0.17 |                  |                  |                                     |
| A2 Ile  | -0.74 |                  |                  | C <sub>γ</sub> H <sub>2</sub> 0.44  |
| A3 Val  | -0.34 |                  | 0.10             |                                     |

<sup>a</sup>Chemical Shifts relative to 5,5-dimethylsilapentanesulfonate (0 ppm). Only Δδ > 0.1 ppm listed.

**Table S6.** DG/RMD Statistical parameters for SCI-57 Ensemble ( $\pm 2\sigma$ )

| NOE restraints:                 |      | Average restraint violations                      |                |
|---------------------------------|------|---------------------------------------------------|----------------|
| total                           | 783  | NOE-violation                                     | 0.038 Å        |
| sequential                      | 287  | Dihedral angle-violation                          | 1.72°          |
| medium                          | 167  |                                                   |                |
| long-range                      | 202  |                                                   |                |
| Intra-residue                   | 127  |                                                   |                |
| Dihedral angle restraints:      |      | Deviations from idea covalent geometry            |                |
|                                 | 47   |                                                   |                |
| φ-angles                        | 34   | bond length                                       | 0.004 Å        |
| χ <sub>1</sub> -angles          | 13   | bond angle                                        | 0.69°          |
| H-bonds:                        | 22   |                                                   |                |
| Main chain (RMSD <sub>1</sub> ) |      | Empirical energy function <sup>3</sup> (kcal/mol) |                |
|                                 |      |                                                   |                |
| α-helices <sup>2</sup>          | 0.23 | NOE restrain energy                               | 59.18 ± 9.6    |
| A-domain                        | 0.33 | van der Waals                                     | 29.64 ± 2.77   |
| B-domain                        | 0.20 | improper dihedral angles                          | 16.76 ± 1.76   |
| Side chain (RMSD <sup>1</sup> ) |      | constrained dihedral angles                       | 8.59 ± 2.07    |
|                                 |      | covalent bond lengths                             | 15.09 ± 1.96   |
| α-helices <sup>2</sup>          | 0.56 | bond angles                                       | 81.81 ± 6.24   |
| A-domain                        | 0.79 | total                                             | 241.10 ± 21.61 |
| B-domain                        | 0.50 |                                                   |                |

(1) RMSD were calculated according to C<sub>α</sub> atoms of residues A1-19 and B5-25.

(2) Helical segments employed in RMSD calculation span residues A2-7, A13-19 and B9-19.

(3) NOE and dihedral force constants were 40 kcal Å<sup>-2</sup> and 40 kcal radian<sup>-2</sup>, respectively (1 kcal = 4.18 kJ)
